# Supplementary material for: Activation of aryl ethers and aryl sulfides by the Fe(η5-C5H5)+ group for the synthesis of phenol dendrons and arene-centered poly-olefin dendrimers
Source: Royal Society of Chemistry journal article supplement (doi:10.1039/b000370k), 2000-01-01
Supplement: b000370k.doc [file b000370k.doc]

**Activation of Aryl Ethers and Aryl Sulfides by the**

**Fe(5-C5H5)+ Group for the Synthesis of Phenol Dendrons and Arene-Centered Poly-Olefin Dendrimers**

Valérie SARTOR#, Sylvain NLATE#, Jean-Luc FILLAUT#, Laurent DJAKOVITCH#, Françoise MOULINES#, Valérie MARVAUD#, Frédéric NEVEU#, Jean-Claude BLAIS**$** , Jean-François LETARD and Didier ASTRUC#*

**Electronic Supplementary Information**

MALDI TOF mass spectra of the 19-allyl dendron **19**, 27-allyl dendrimer **20**, 54-allyl dendrimer **21** and 81-allyl dendrimer **10**:

1) MALDI TOF mass spectrum of the 19-allyl dendron **19**: The M + Na+ and M + K+ molecular peaks are observed. Also note the tiny peaks of the 27-allyl dendron at 2780.

2) MALDI TOF mass spectrum of the 27-allyl dendrimer **20**: The M + Na+ and M + K+ molecular peaks are observed.

3) MALDI TOF mass spectrum of the 54-allyl dendrimer **21**: The M + Na+ molecular peak at 5654.1 is dominant. Note the peaks at 4786.19 and 3852.08 representing the octa- and hepta-substituted dendrimers respectively indicating products resulting from slightly uncomplete reaction. The peak at 5424.9 represents a product in which only one phenoltriallyl group is missing, as a result from a very small amount of impurity in the starting tri- and nona-allyl dendrons.

4) MALDI TOF mass spectrum of the 81-allyl dendrimer **10**. The M + Na+ molecular peak is dominant. The other peaks located slightly before with lower mass represent products resulting from the lack of one to nine phenoltriallyl units
